# Supplementary material for: Cohort Study of Maternal Gestational Weight Gain, Gestational Diabetes, and Childhood Asthma
Source: MDPI journal article supplement (doi:10.3390/nu14235188), 2022-12-06
Supplement: s1 [file s1]

# **Prospective study of maternal gestational weight gain, gestational diabetes and childhood asthma**

## **Supplementary materials**

Orianne Dumas, Anna Chen Arroyo, M. Kamal Faridi, Kaitlyn James, Sarah Hsu, Camille Powe, Carlos A. Camargo Jr.

**Table S1.** Comparison of maternal and child's characteristics in mother-child pairs with or without missing data for GDM.

|                                                                     | Missing data for GDM |              |        |
|---------------------------------------------------------------------|----------------------|--------------|--------|
|                                                                     | No (n=15,171)        | Yes (n=1180) | P      |
| <b>Maternal characteristics</b>                                     |                      |              |        |
| Early pregnancy BMI, kg/m2, %                                       |                      |              | <0.001 |
| < 20.0                                                              | 8.4                  | 5.7          |        |
| 20.0-22.4                                                           | 19.9                 | 16.3         |        |
| 22.5-24.9                                                           | 22.9                 | 18.4         |        |
| 25-29.9                                                             | 29.0                 | 27.1         |        |
| ≥30                                                                 | 19.9                 | 32.5         |        |
| GWG, lb, %                                                          |                      |              | <0.001 |
| <15                                                                 | 12.7                 | 28.8         |        |
| 15-24                                                               | 25.3                 | 26.2         |        |
| 25-34                                                               | 34.4                 | 27.8         |        |
| 35-44                                                               | 19.9                 | 12.3         |        |
| ≥45                                                                 | 7.8                  | 4.9          |        |
| GWG relative to recommendations, %                                  |                      |              | <0.001 |
| Under recommended weight gain                                       | 22.9                 | 36.2         |        |
| Meets recommended weight gain                                       | 36.6                 | 32.9         |        |
| Over recommended weight gain                                        | 40.5                 | 30.9         |        |
| C-section, %                                                        | 27.8                 | 35.1         | <0.001 |
| Nulliparous, %                                                      |                      |              | <0.001 |
| Yes                                                                 | 47.7                 | 42.3         |        |
| No                                                                  | 49.3                 | 53.6         |        |
| Missing                                                             | 3.0                  | 4.1          |        |
| Age at delivery, mean (SD)                                          | 30.3 (6.3)           | 30.4 (6.8)   | 0.72   |
| Maternal Race/ethnicity, %                                          |                      |              | 0.008  |
| White                                                               | 51.5                 | 47.2         |        |
| Black                                                               | 7.5                  | 9.7          |        |
| Hispanic                                                            | 20.0                 | 22.3         |        |
| Asian                                                               | 7.6                  | 7.3          |        |
| Other                                                               | 13.4                 | 13.6         |        |
| Maternal asthma, %                                                  | 8.0                  | 8.1          | 0.95   |
| Smoking status (3 months prior to pregnancy or during pregnancy), % | 7.6                  | 10.1         | 0.002  |
| Insurance status at birth, %                                        |                      |              | <0.001 |
| Private                                                             | 55.5                 | 48.6         |        |

**Table S1.** Comparison of maternal and child's characteristics in mother-child pairs with or without missing data for GDM.

|                                | Missing data for GDM |              | P      |
|--------------------------------|----------------------|--------------|--------|
|                                | No (n=15,171)        | Yes (n=1180) |        |
| Public                         | 34.3                 | 40.5         |        |
| Limited                        | 6.5                  | 6.8          |        |
| Other                          | 3.6                  | 4.1          |        |
| <b>Child's characteristics</b> |                      |              |        |
| Female, %                      | 47.8                 | 48.3         | 0.76   |
| Birth weight, lb, %            |                      |              | <0.001 |
| <5.5                           | 6.4                  | 13.6         |        |
| 5.5-6.9                        | 26.8                 | 24.8         |        |
| 7.0-8.4                        | 49.3                 | 42.5         |        |
| 8.5-9.9                        | 16.1                 | 15.4         |        |
| ≥10                            | 1.4                  | 3.7          |        |
| Gestational age, %             |                      |              | <0.001 |
| <32                            | 0.67                 | 6.1          |        |
| 32-36                          | 5.8                  | 8.2          |        |
| ≥37                            | 93.5                 | 85.7         |        |
| Atopic dermatitis, %           | 1426 (9.4)           | 8.5          | 0.29   |
| Allergic rhinitis, %           | 1588 (10.5)          | 10.1         | 0.68   |

BMI – Body Mass Index; GDM - gestational diabetes mellitus; GWG – Gestational Weight Gain

% missing values is displayed for variables with >3% missing values

Women with missing data for GDM include women known to have pre-existing diabetes, who were not screened for GDM, and women with abnormal GLT and no / incomplete OGTT

**Table S2.** Associations of maternal BMI and GWG with incidence of asthma in childhood according to the child's sex

|                                                 | OR (95% CI) - boys      | OR (95% CI) - girls     | p-inter |
|-------------------------------------------------|-------------------------|-------------------------|---------|
| Maternal early pregnancy BMI, kg/m <sup>2</sup> |                         |                         |         |
| < 20.0                                          | 1.20 (0.94-1.53)        | 0.90 (0.65-1.25)        | 0.11    |
| 20.0-22.4 (ref.)                                | 1                       | 1                       |         |
| 22.5-24.9                                       | <b>1.22 (1.01-1.47)</b> | 1.07 (0.85-1.35)        | 0.45    |
| 25-29.9                                         | 1.13 (0.94-1.36)        | <b>1.31 (1.06-1.62)</b> | 0.25    |
| ≥30                                             | <b>1.33 (1.10-1.62)</b> | <b>1.26 (1.00-1.58)</b> | 0.88    |
| Maternal GWG (lb)†                              |                         |                         |         |
| <15                                             | 1.03 (0.85-1.24)        | 1.09 (0.87-1.36)        | 0.57    |
| 15-24                                           | 1.01 (0.87-1.19)        | 0.88 (0.73-1.06)        | 0.25    |
| 25-34 (ref.)                                    | 1                       | 1                       |         |
| 35-44                                           | 0.97 (0.81-1.14)        | 0.97 (0.79-1.19)        | 0.98    |
| ≥45                                             | 1.12 (0.89-1.40)        | 0.84 (0.62-1.13)        | 0.17    |
| GWG relative to recommendations†                |                         |                         |         |
| Under recommendations                           | 1.05 (0.9-1.22)         | 1.05 (0.87-1.26)        | 0.82    |
| Meets recommendations                           | 1                       | 1                       |         |
| Over recommendations                            | 0.99 (0.86-1.14)        | 1.03 (0.87-1.21)        | 0.44    |

BMI – Body Mass Index; GWG – Gestational Weight Gain; OR – Odds Ratio; CI – Confidence Interval. Analyses were adjusted for maternal age at delivery, asthma, maternal race/ethnicity, smoking status, insurance status at birth, mode of delivery (C-section). †Analyses were further adjusted for maternal early pregnancy BMI.

**Table S3.** Associations of GWG with incidence of asthma in childhood according to maternal early pregnancy BMI.

| Maternal GWG (lb)               | OR (95% CI) -<br>20-24.9 kg/m <sup>2</sup> | OR (95% CI) -<br>≥25 kg/m <sup>2</sup> | p-inter |
|---------------------------------|--------------------------------------------|----------------------------------------|---------|
| <15                             | 0.97 (0.69-1.35)                           | 0.96 (0.80-1.16)                       | 0.91    |
| 15-24                           | 0.98 (0.80-1.18)                           | 0.87 (0.73-1.04)                       | 0.37    |
| 25-34 (ref.)                    | 1                                          | 1                                      | -       |
| 35-44                           | 0.88 (0.72-1.07)                           | 1.03 (0.85-1.26)                       | 0.26    |
| ≥45                             | 0.98 (0.74-1.30)                           | 1.02 (0.78-1.32)                       | 0.79    |
| GWG relative to recommendations |                                            |                                        |         |
| Under recommendations           | 0.99 (0.82-1.18)                           | 1.04 (0.85-1.27)                       | 0.76    |
| Meets recommendations           | 1                                          | 1                                      | -       |
| Over recommendations            | 0.92 (0.77-1.11)                           | 1.10 (0.95-1.28)                       | 0.12    |

BMI – Body Mass Index; GWG – Gestational Weight Gain; OR – Odds Ratio; CI – Confidence Interval.

Analyses were adjusted for maternal age at delivery, asthma, maternal race/ethnicity, smoking status, insurance status at birth, mode of delivery (C-section).

**Table S4.** Associations of GDM with incidence of allergic and non-allergic asthma in childhood, with further adjustment for gestational age.

|                                            | All asthma  |                         | Non-allergic asthma |                         | Allergic asthma |                  |
|--------------------------------------------|-------------|-------------------------|---------------------|-------------------------|-----------------|------------------|
|                                            | No of cases | OR (95% CI)             | No of cases         | OR (95% CI)             | No of cases     | OR (95% CI)      |
| GDM, Carpenter-Coustan criteria            |             |                         |                     |                         |                 |                  |
| No                                         | 1,980       | 1                       | 1,301               | 1                       | 679             | 1                |
| Yes                                        | 122         | 1.17 (0.95-1.45)        | 78                  | 1.11 (0.86-1.44)        | 44              | 1.25 (0.91-1.74) |
| GDM, National Diabetes Data Group criteria |             |                         |                     |                         |                 |                  |
| No                                         | 2,015       | 1                       | 1,318               | 1                       | 697             | 1                |
| Yes                                        | 87          | <b>1.37 (1.06-1.76)</b> | 61                  | <b>1.44 (1.07-1.94)</b> | 26              | 1.20 (0.79-1.82) |

BMI – Body Mass Index; GDM – gestational diabetes mellitus; OR – Odds Ratio; CI – Confidence Interval. Analyses were adjusted for maternal early pregnancy BMI, age at delivery, asthma, maternal race/ethnicity, smoking status, insurance status at birth, mode of delivery (C-section), and gestational age.

**Table S5.** Associations of GDM with incidence of asthma in childhood according to the child's sex.

|                                            | OR (95% CI) - boys      | OR (95% CI) - girls | p-inter |
|--------------------------------------------|-------------------------|---------------------|---------|
| GDM, Carpenter-Coustan criteria            |                         |                     |         |
| No                                         | 1                       | 1                   |         |
| Yes                                        | 1.20 (0.92-1.57)        | 1.26 (0.91-1.74)    | 0.56    |
| GDM, National Diabetes Data Group criteria |                         |                     |         |
| No                                         | 1                       | 1                   |         |
| Yes                                        | <b>1.54 (1.12-2.12)</b> | 1.28 (0.85-1.93)    | 0.70    |

BMI – Body Mass Index; GDM – gestational diabetes mellitus; OR – Odds Ratio; CI – Confidence Interval. Analyses were adjusted for maternal early pregnancy BMI, age at delivery, asthma, maternal race/ethnicity, smoking status, insurance status at birth, mode of delivery (C-section).
